# Supplementary material for: Testing the contagious nature of allopreening: bystander ravens are affected by conspecifics’ affiliative interactions
Source: PubMed Central journal article supplement (PMC7616304; doi:10.1016/j.anbehav.2021.12.009), 2022-02
Supplement: EMS197395-supplement-Appendix.pdf [file EMS197395-supplement-Appendix.pdf]

## Appendix

**Table A1**  
Ethogram

| Behavioural category | Behaviour       | Measurement unit                                            | Description                                                                                                                                                                                                         |
|----------------------|-----------------|-------------------------------------------------------------|---------------------------------------------------------------------------------------------------------------------------------------------------------------------------------------------------------------------|
| Self-directed        | Beak wipe       | Frequency, one beak wipe on one side counts as one instance | Bird wipes its beak against a hard surface, typically a perch                                                                                                                                                       |
| Self-directed        | Scratch         | Frequency, two bouts are separated by 5 s                   | Bird scratches any body part with its foot                                                                                                                                                                          |
| Self-directed        | Stretch         | Frequency, two bouts are separated by 5 s                   | Bird stretches its wings and legs in the air                                                                                                                                                                        |
| Self-directed        | Shake           | Frequency, two bouts are separated by 5 s                   | Bird shakes its body and feathers                                                                                                                                                                                   |
| Self-directed        | Autopreening    | Duration                                                    | Bird holds and/or gently runs its feathers through its beak                                                                                                                                                         |
| Agonistic            | Chase           | Duration*                                                   | Bird pursues another one in flight/on ground                                                                                                                                                                        |
| Agonistic            | Displace        | Frequency                                                   | Bird retreats/moves away within 1–2 s after another bird approaches to within 1 m and eventually takes its position. With or without vocalization of either bird, and with or without physical contact between them |
| Agonistic            | Threat          | Frequency                                                   | Bird threatens another one, with display 'thick head approach' and / or visual threat (the aggressor pecks in the direction of the victim without touching it)                                                      |
| Agonistic            | Fight           | Duration*                                                   | Two birds hit each other with their feet/beaks, with one/ both birds jumping in the air or with one bird on the ground and one sitting on top                                                                       |
| Affiliative          | Contact-sit     | Duration                                                    | Two birds sit next to each other within 10 cm, typically on a perch                                                                                                                                                 |
| Affiliative          | Touch/hold      | Duration                                                    | Bird touches another's body with its beak, without performing preening movements                                                                                                                                    |
| Affiliative          | Allopreening    | Duration                                                    | Bird touches/runs its beak through the feathers of another bird for longer than 2 s                                                                                                                                 |
| Affiliative          | Approach        | Frequency, two bouts are separated by 5 s                   | Bird actively moves close to a conspecific, followed by a positive (affiliative) or neutral (no) interaction                                                                                                        |
| Affiliative          | Close proximity | Duration                                                    | Bird spending time within 1 m of conspecifics                                                                                                                                                                       |

\* As 'chase' and 'fight' occurred only once (and for less than 5 s) during data collection, we treated these behaviours as frequency data and pooled them with 'displace' and 'threat' in the category 'agonistic behaviours'.

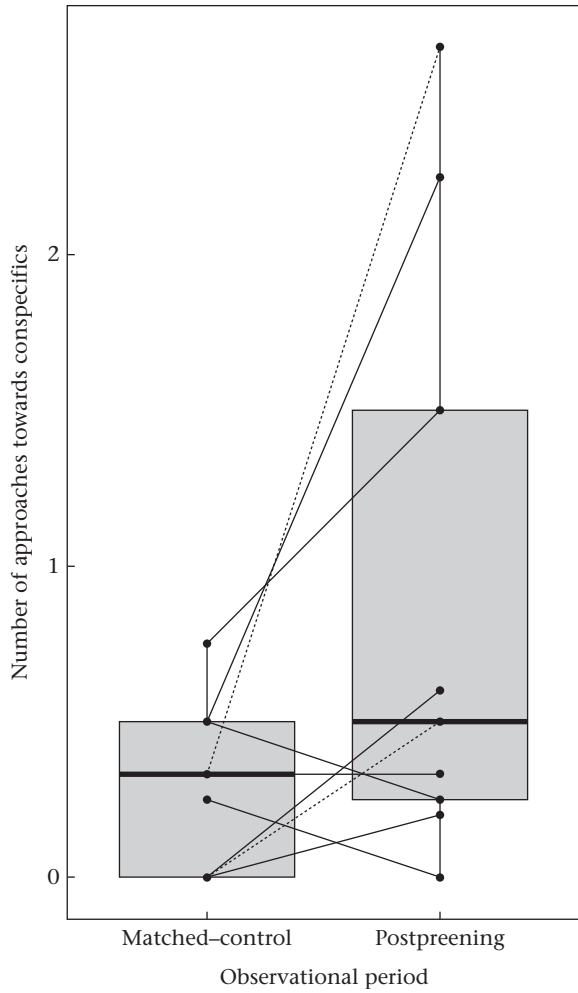

**Figure A1.** Number of approaches towards at least one conspecific in postpreening and the respective matched-control observations. Points represent the average number per focal subject in each observation. The box plots show the median and 25th and 75th percentiles; the whiskers indicate the values within 1.5 times the interquartile range. Solid lines indicate female focal subjects; dashed lines indicate male focal subjects. Wilcoxon test:  $P = 0.08$ ,  $N = 9$ .

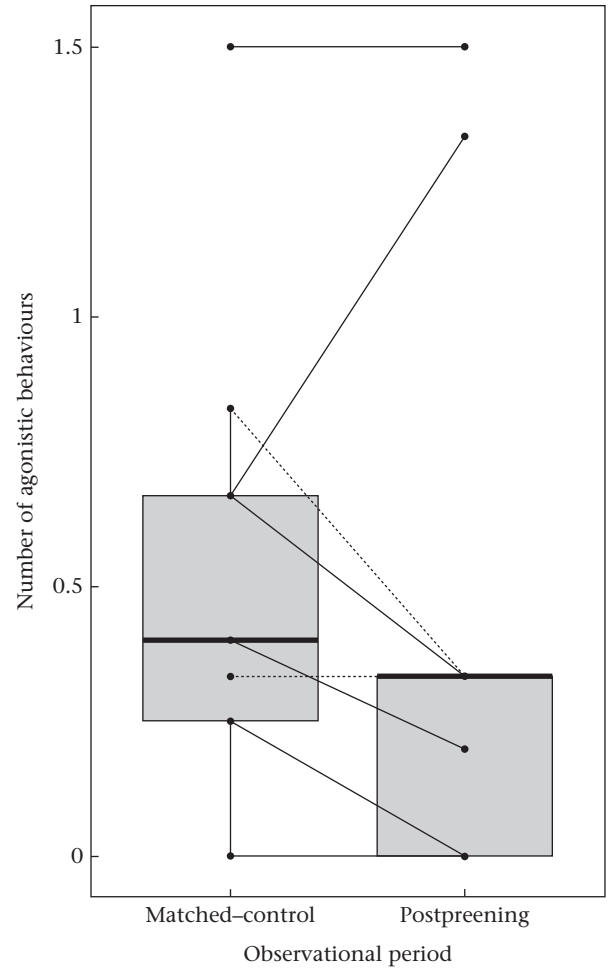

**Figure A2.** Number of agonistic behaviours in postpreening and the respective matched-control observations. Points represent the average number per focal subject in each observation. The box plots show the median and 25th and 75th percentiles; the whiskers indicate the values within 1.5 times the interquartile range. Solid lines indicate female focal subjects; dashed lines indicate male focal subjects. Wilcoxon test:  $P = 0.59$ ,  $N = 9$ .

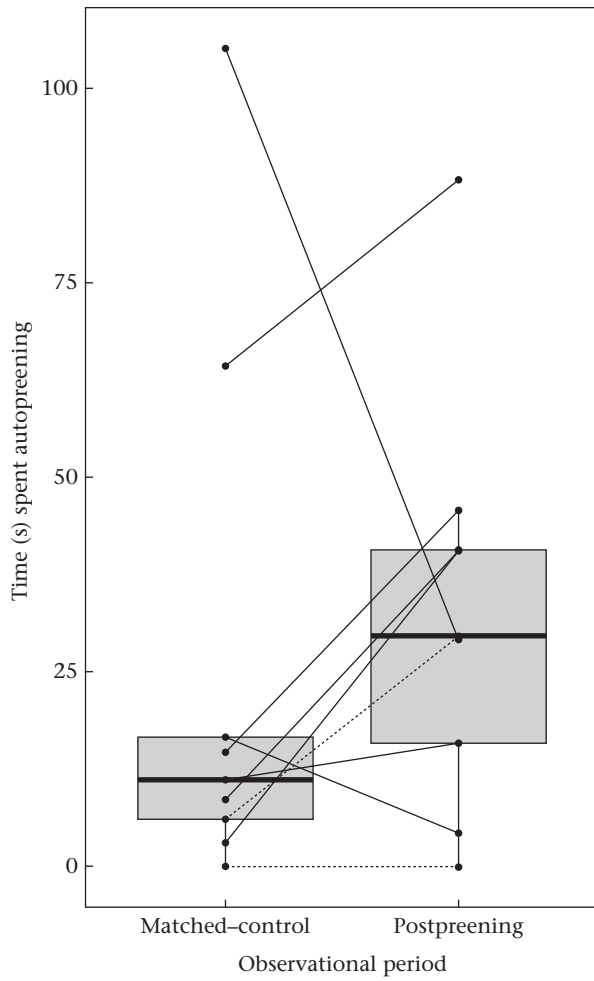

**Figure A3.** Time spent autopreening in postpreening and the respective matched-control observations. Points represent the average time (s) per focal subject in each observation. The box plots show the median and 25th and 75th percentiles; the whiskers indicate the values within 1.5 times the interquartile range. Solid lines indicate female focal subjects; dashed lines indicate male focal subjects. Wilcoxon test:  $P = 0.29$ ,  $N = 9$ .

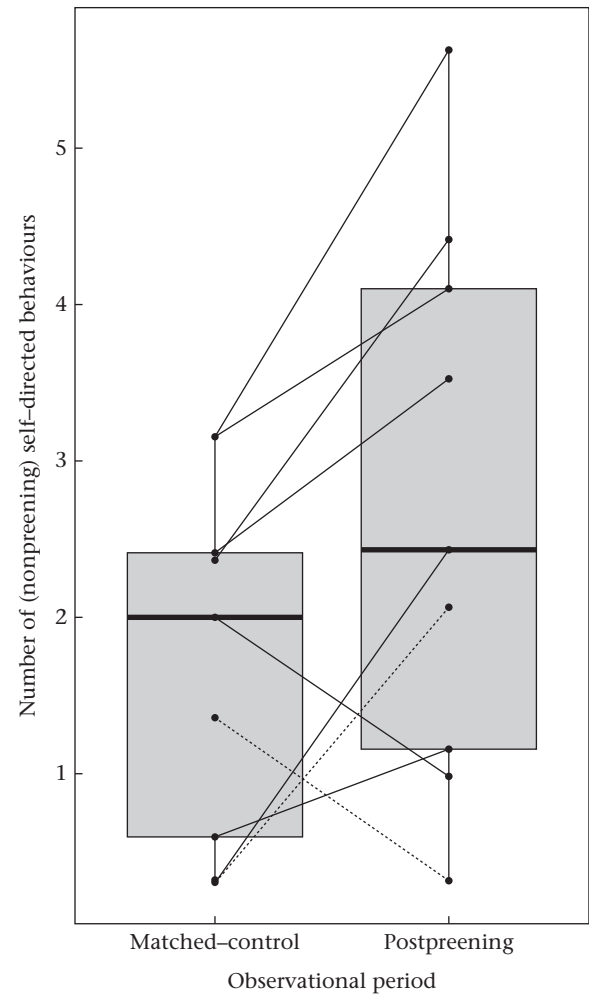

**Figure A4.** Number of (nonpreening) self-directed behaviours in postpreening and the respective matched-control observations. Points represent the average number per focal subject in each observation. The box plots show the median and 25th and 75th percentiles; the whiskers indicate the values within 1.5 times the interquartile range. Solid lines indicate female focal subjects; dashed lines indicate male focal subjects. Wilcoxon test:  $P = 0.074$ ,  $N = 9$ .
